# Supplementary material for: A 3D porous Li-rich cathode material with an in situ modified surface for high performance lithium ion batteries with reduced voltage decay
Source: Royal Society of Chemistry journal article supplement (doi:10.1039/c6ta01448h), 2016-01-01
Supplement: c6ta01448h1.pdf [file c6ta01448h1.pdf]

## Electronic Supporting Information

### 3D Porous Li-rich cathode material with *in situ* modified surface for high performance lithium ion batteries with reduced voltage decay

Xin He,<sup>a</sup> Jun Wang,<sup>a</sup> Rui Wang,<sup>b</sup> Bao Qiu,<sup>c</sup> Henrich Frielinghaus\*,<sup>b</sup> Philip Niehoff,<sup>a</sup> Haidong Liu,<sup>a</sup> Marian Cristian Stan,<sup>a</sup> Elie Paillard,<sup>d</sup> Martin Winter,<sup>a</sup> Jie Li\*,<sup>a</sup>

<sup>a</sup> MEET Battery Research Center, Institute of Physical Chemistry, University of Muenster, Corrensstrasse 46, 48149 Muenster, Germany

<sup>b</sup> Jülich Centre for Neutron Science at MLZ, Forschungszentrum Jülich GmbH, Lichtenbergstrasse 1, D-85747 Garching, Germany

<sup>c</sup> Ningbo Institute of Materials Technology and Engineering (NIMTE), Chinese Academy of Sciences, Ningbo, Zhejiang, 315201, China

<sup>d</sup> Helmholtz Institute Münster – Forschungszentrum Jülich GmbH (IEK12), Corrensstraße 46, 48149 Münster, D-48149 Münster, Germany

### Experimental

#### Preparation of the monodispersed polystyrene (PS) template:

The PS sphere is synthesized by emulsion polymerization method. Potassium peroxy sulfate (0.12 g) used as an initiator and sodium dodecyl sulfate (SDS 0.4 g) used as a surfactant. Both are first dissolved in aqueous alcohol in a 250 ml three-neck flask. Then the styrene (40 ml) monomer is gradually added under Ar atmosphere with continuous rapid stirring.<sup>1, 2</sup> After heated to 70 °C for 8 hours, the polymerization process come to complete, the PS sphere powder was then collected by evaporating the water solvent in freeze dryer. The SEM image of obtained PS particles can be viewed in Figure S1, and the size is between 50 – 80 nm.

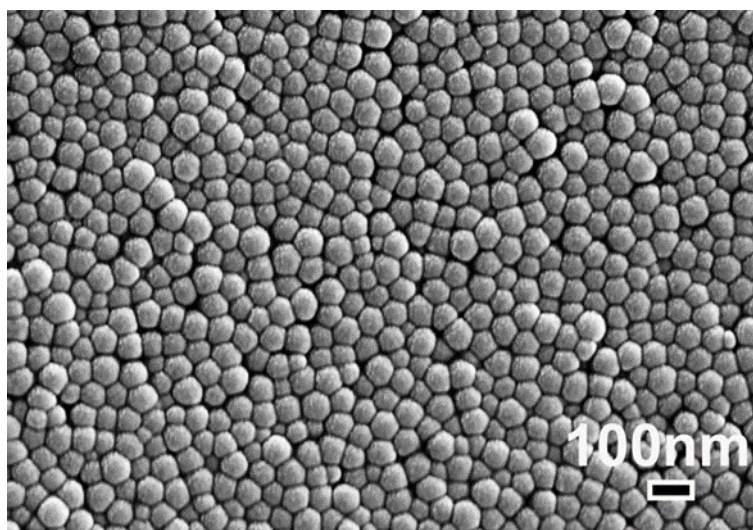

**Figure S1.** The SEM image of obtained PS particles

**Table S1.** Lattice parameters of CP-LMNC and PS-LMNC materials obtained by Rietveld refinement

|                        |                            | CP-LMNC   | PS-LMNC   |
|------------------------|----------------------------|-----------|-----------|
| MNC<br>( <i>R-3m</i> ) | <i>a</i> (Å)               | 2.8561(1) | 2.8563(1) |
|                        | <i>c</i> (Å)               | 14.246(1) | 14.259(1) |
|                        | <i>c/a</i>                 | 4.988     | 4.992     |
|                        | <i>V</i> (Å <sup>3</sup> ) | 100.64(1) | 100.75(2) |
|                        | Phase content %            | 61.0(4)   | 60.8(4)   |
| LMO<br>( <i>C2/m</i> ) | <i>a</i> (Å)               | 4.975(1)  | 4.959(1)  |
|                        | <i>b</i> (Å)               | 8.559(2)  | 8.561(3)  |
|                        | <i>c</i> (Å)               | 5.009(1)  | 5.021(1)  |
|                        | <i>V</i> (Å <sup>3</sup> ) | 201.60(9) | 201.28(9) |
|                        | Phase content %            | 39.0(4)   | 39.2(4)   |
| <i>R</i> <sub>wp</sub> | 3.69                       | 4.28      |           |

**Table S2.** CHN-Analysis results for PS-LMNC and CP-LMNC materials

|         | C   | H    | N |
|---------|-----|------|---|
| PS-LMNC | 0.2 | 0.25 | - |
| CP-LMNC | -   | -    | - |

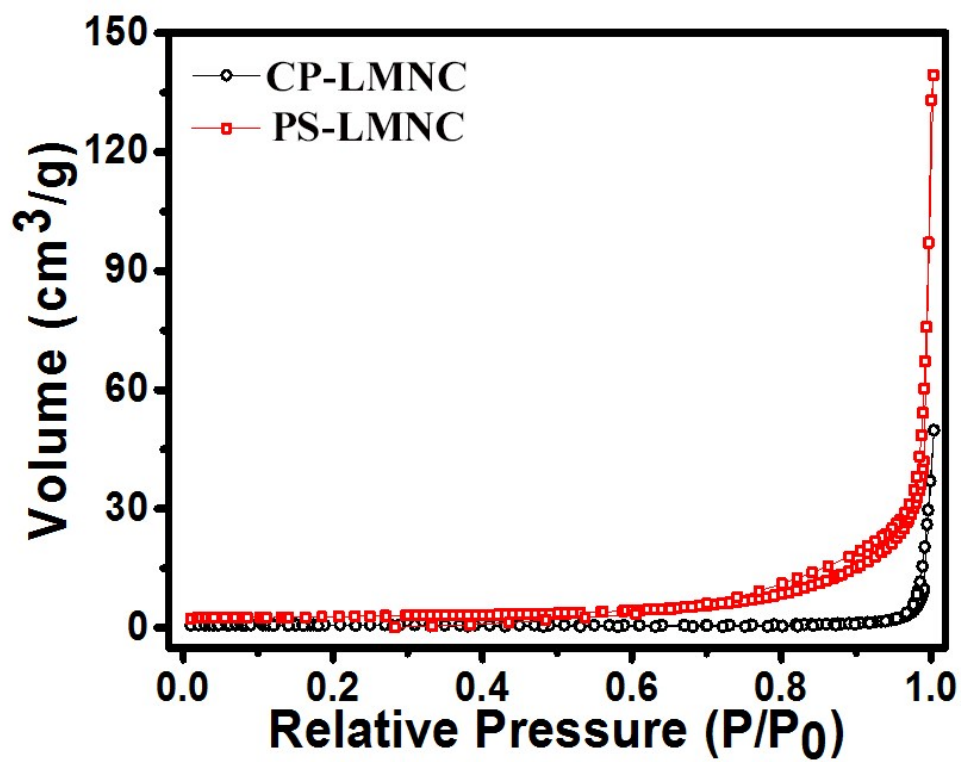

**Figure S2.** Nitrogen adsorption-desorption isotherms of CP-LMNC and PS-LMNC materials.

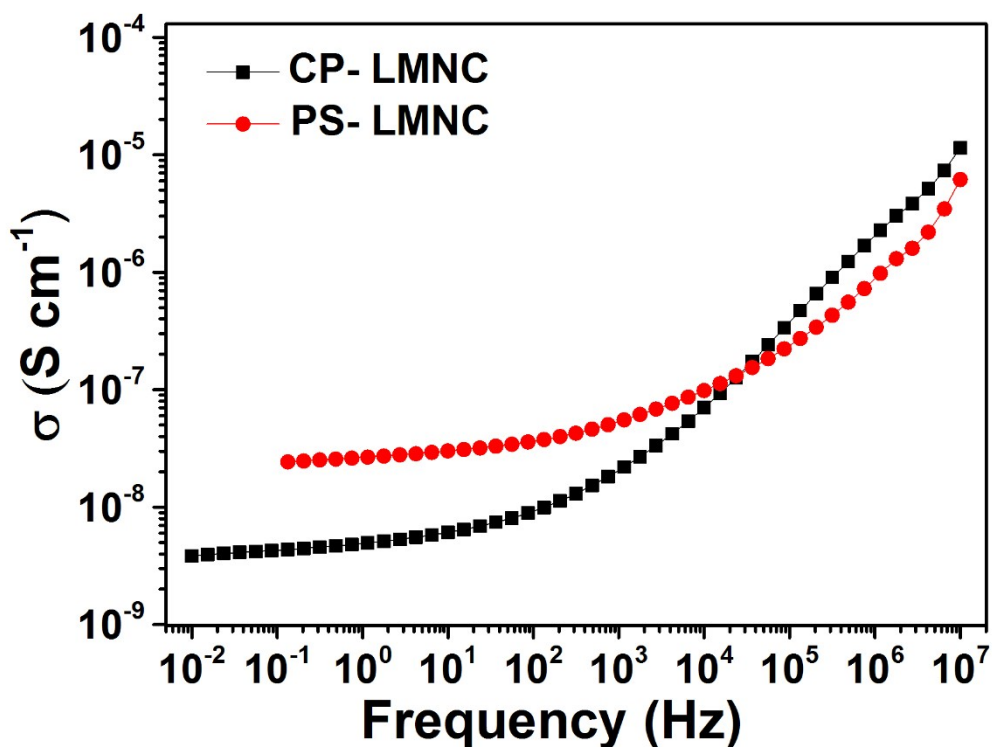

**Figure S3.** Plots of the conductivity vs. frequency for CP-LMNC and PS-LMNC materials.

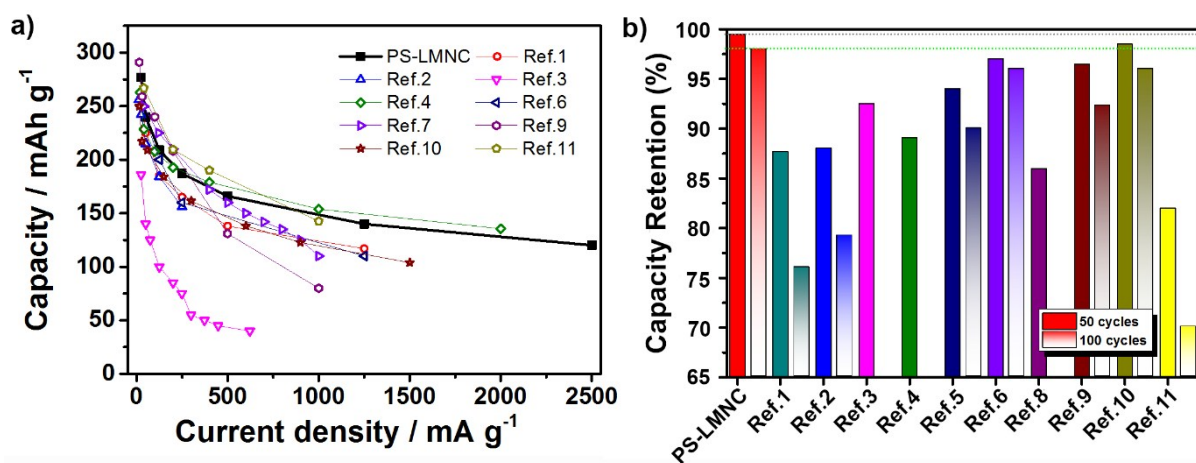

**Figure S4.** Comparison in the rate performance (a) and cycling stability (b) of the porous Li-rich materials prepared in this work with the literature reports. The detail information of literature materials are given in the table S3.

**Table S3.** The list of the literatures and the properties of corresponding Li-rich materials which are compared in the Figure S4.

| Sample name            | Composition                                                                                  | Morphology              | Rate for cycling test (mA g <sup>-1</sup> ) | Mass loading (mg cm <sup>-3</sup> ) |
|------------------------|----------------------------------------------------------------------------------------------|-------------------------|---------------------------------------------|-------------------------------------|
| Ref.1 <sup>3</sup>     | Li <sub>1.2</sub> Mn <sub>0.54</sub> Ni <sub>0.13</sub> Co <sub>0.13</sub> O <sub>2</sub>    | Hierarchically porous   | 50                                          |                                     |
| Ref.2 <sup>4</sup>     | Li <sub>1.2</sub> Mn <sub>0.54</sub> Ni <sub>0.13</sub> Co <sub>0.13</sub> O <sub>2</sub>    | Porous hollow structure | 250                                         |                                     |
| Ref.3 <sup>5</sup>     | Li <sub>1.2</sub> Mn <sub>0.54</sub> Ni <sub>0.22</sub> Fe <sub>0.04</sub> O <sub>2</sub>    | Porous                  | 28                                          | 3-5                                 |
| Ref.4 <sup>6</sup>     | Li <sub>1.2</sub> Mn <sub>0.54</sub> Ni <sub>0.13</sub> Co <sub>0.13</sub> O <sub>2</sub>    | Macroporous             | 200                                         |                                     |
| Ref.5 <sup>7</sup>     | Li <sub>1.1</sub> Mn <sub>0.55</sub> Ni <sub>0.35</sub> O <sub>2</sub>                       | Porous nanorods         | 50                                          |                                     |
| Ref.6 <sup>8</sup>     | Li <sub>1.2</sub> Mn <sub>0.54</sub> Ni <sub>0.13</sub> Co <sub>0.13</sub> O <sub>2</sub>    | Porous fiber            | 1250                                        | ~10                                 |
| Ref.7 <sup>9</sup>     | Li <sub>1.2</sub> Mn <sub>0.53</sub> Ni <sub>0.13</sub> Co <sub>0.13</sub> O <sub>2</sub>    | Porous                  | 40                                          | 1.5-2.5                             |
| Ref.8 <sup>10</sup>    | Li <sub>1.2</sub> Mn <sub>0.54</sub> Ni <sub>0.13</sub> Co <sub>0.13</sub> O <sub>2</sub>    | Porous micro-rod        | 50                                          |                                     |
| Ref.9 <sup>11</sup>    | Li <sub>1.17</sub> Mn <sub>0.50</sub> Ni <sub>0.33</sub> O <sub>2</sub>                      | Mesoporous foams        | 15                                          |                                     |
| Ref.10 <sup>12</sup>   | Li <sub>1.2</sub> Mn <sub>0.534</sub> Ni <sub>0.133</sub> Co <sub>0.133</sub> O <sub>2</sub> | Porous                  | 300                                         | ~ 1.5                               |
| Ref.11 <sup>13</sup>   | Li <sub>1.19</sub> Mn <sub>0.32</sub> Co <sub>0.49</sub> O <sub>2</sub>                      | Porous nanorods         | 40                                          |                                     |
| PS-LNCM (in this work) | Li <sub>1.2</sub> Mn <sub>0.56</sub> Ni <sub>0.16</sub> Co <sub>0.08</sub> O <sub>2</sub>    | Porous                  | 125                                         | 2-2.5                               |

1. D.-l. Ma, Z.-y. Cao, H.-g. Wang, X.-l. Huang, L.-m. Wang and X.-b. Zhang, *Energy & Environmental Science*, 2012, **5**, 8538-8542.
2. J. Zhang, Z. Chen, Z. Wang, W. Zhang and N. Ming, *Materials Letters*, 2003, **57**, 4466-4470.
3. M. Chen, X. Xiang, D. Chen, Y. Liao, Q. Huang and W. Li, *Journal of Power Sources*, 2015, **279**, 197-204.
4. Z. He, Z. Wang, H. Chen, Z. Huang, X. Li, H. Guo and R. Wang, *Journal of Power Sources*, 2015, **299**, 334-341.
5. T. R. Penki, D. Shanmughasundaram and N. Munichandraiah, *Electrochimica Acta*, 2014, **143**, 152-160.
6. S. J. Shi, J. P. Tu, Y. Y. Tang, Y. Q. Zhang, X. L. Wang and C. D. Gu, *Journal of Power Sources*, 2013, **240**, 140-148.
7. J. Yang, F. Cheng, X. Zhang, H. Gao, Z. Tao and J. Chen, *Journal of Materials Chemistry A*, 2014, **2**, 1636-1640.
8. C. Yang, S. Han, J. Huang and M. Qian, *Materials Chemistry and Physics*, 2015, **149-150**, 695-700.
9. T. Rao Penki, D. Shanmughasundaram, A. V. Jeyaseelan, A. K. Subramani and N. Munichandraiah, *Journal of The Electrochemical Society*, 2014, **161**, A33-A39.
10. L. Zhang, W. Borong, L. Ning and W. Feng, *Electrochimica Acta*, 2014, **118**, 67-74.
11. Y. Jiang, Z. Yang, W. Luo, X.-L. Hu, W.-X. Zhang and Y.-H. Huang, *Journal of Materials Chemistry*, 2012, **22**, 14964-14969.
12. C. Cao, L. Xi, K. L. Leung, M. Wang, Y. Liu, R. Ma, S. Yang, Z. Lu and C. Y. Chung, *RSC Advances*, 2015, **5**, 30507-30513.
13. D. Chen, Q. Yu, X. Xiang, M. Chen, Z. Chen, S. Song, L. Xiong, Y. Liao, L. Xing and W. Li, *Electrochimica Acta*, 2015, **154**, 83-93.
